# Supplementary material for: 5FU encapsulated polyglycerol sebacate nanoparticles as anti-cancer drug carriers
Source: Royal Society of Chemistry journal article supplement (doi:10.1039/d1ra01722e), 2021-01-01
Supplement: d1ra01722e1.pdf [file d1ra01722e1.pdf]

**5FU encapsulated polyglycerol sebacate nanoparticles as anti-cancer drug carriers**

Divya Sivanesan\*, Rama S Verma\*, Edamana Prasad\*\*

*\*Department of Biotechnology, Indian Institute of Technology Madras, Chennai-600036, India*

*\*\* Department of Chemistry, Indian Institute of Technology Madras, Chennai-600036, India*

*Email: pre@iitm.ac.in, vermars@iitm.ac.in*

## Table of contents

|                                                                 | <b>Page</b> |
|-----------------------------------------------------------------|-------------|
| 1. NMR spectra of glycerol, sebacic acid, polyglycerol sebacate | S3          |
| 2. TGA analysis of PGS-NP and PGS-5FU                           | S4          |
| 3. DSC analysis of PGS prepolymer, PGS-NP and PGS-5FU           | S5          |
| 4. Standard curve of 5FU drug in PBS                            | S6          |
| 5. DLS of different concentrations of PGS-NP                    | S7          |

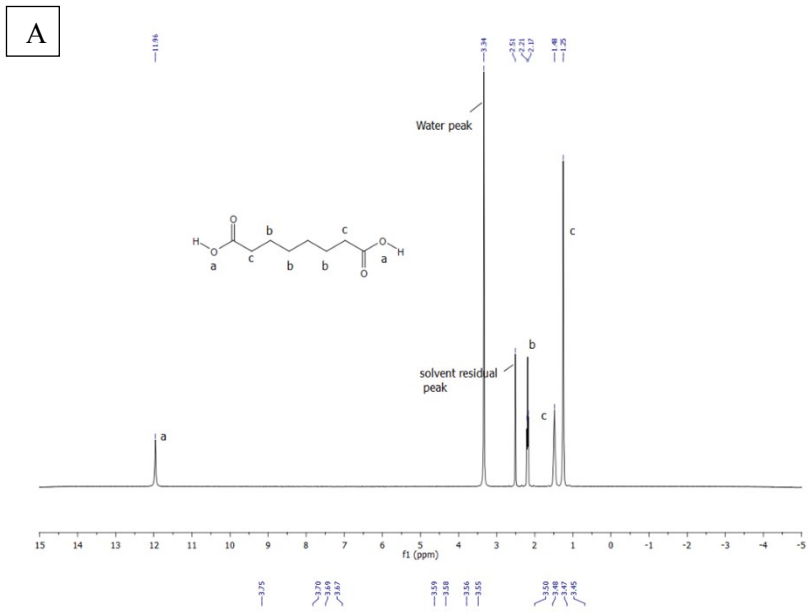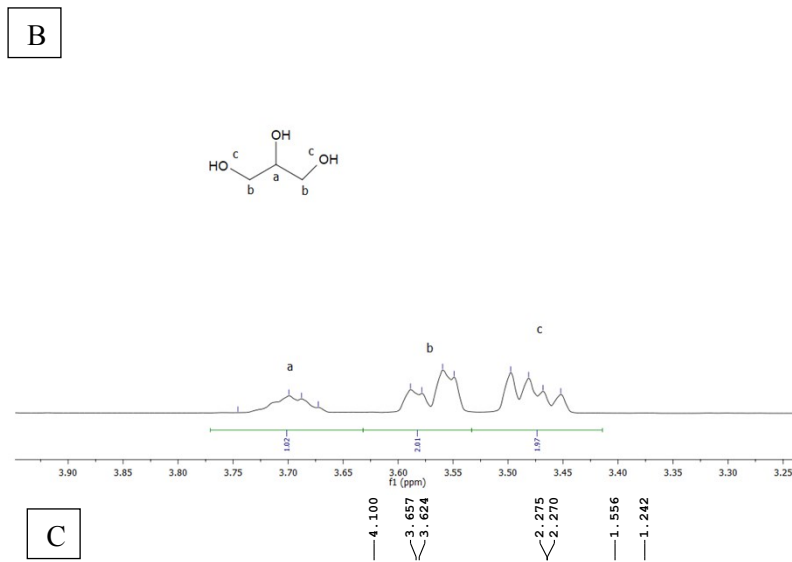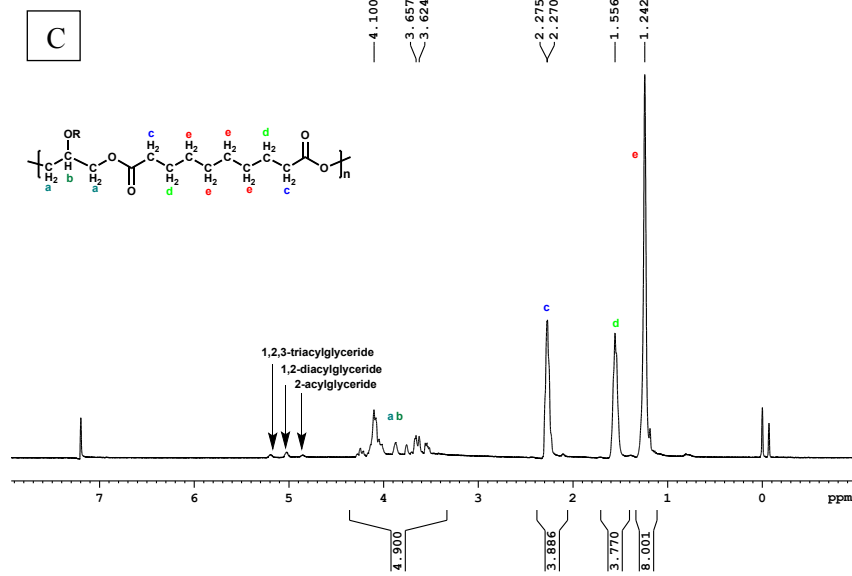

**Fig. S1** NMR spectra of A) sebacic acid, B) glycerol and C) polyglycerol sebacate.

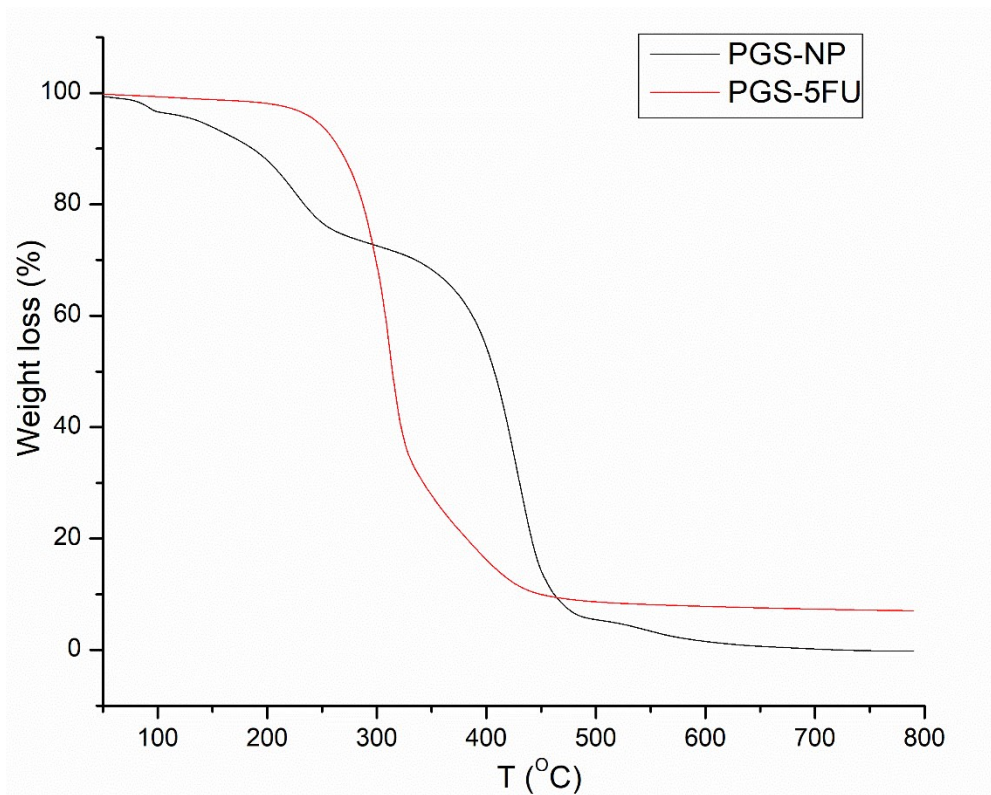

**Fig. S2** TGA analysis of PGS nanoparticles and nanoparticles loaded with 5FU drug.

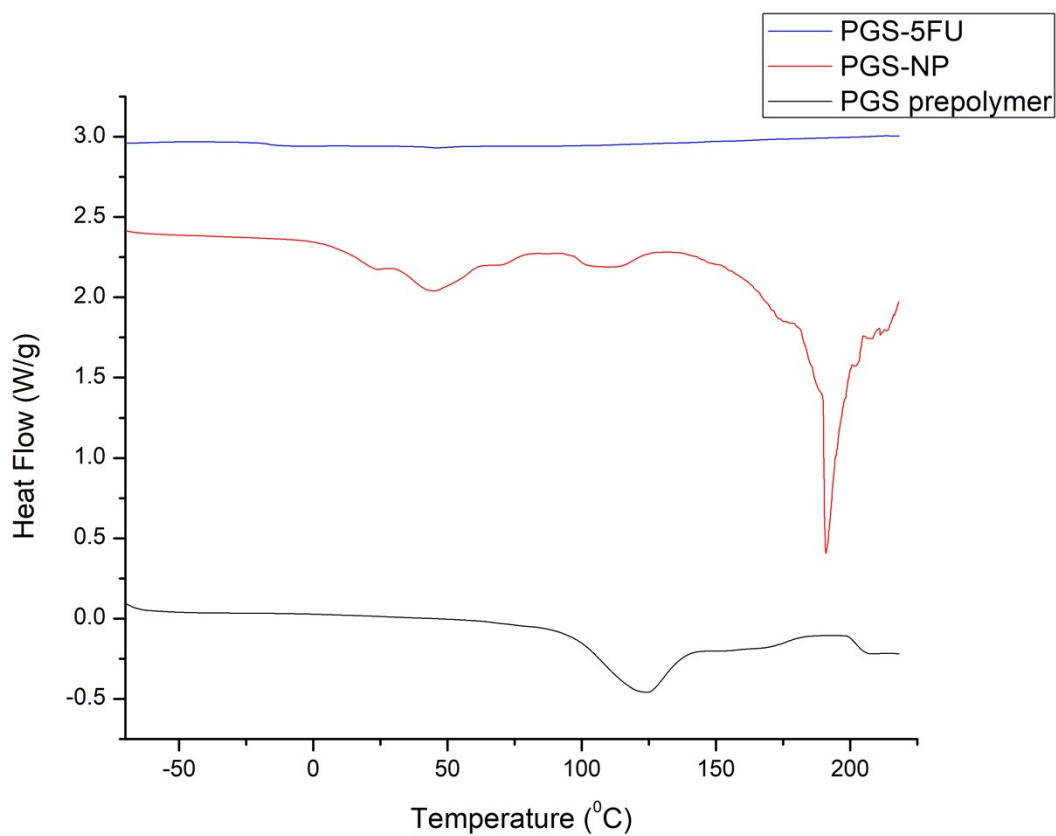

**Fig. S3** Differential scanning calorimetry (DSC) analysis of PGS prepolymer, PGS nanoparticles and 5FU encapsulated PGS nanoparticles showing decreasing order of crystallinity with PGS-5FU being amorphous.

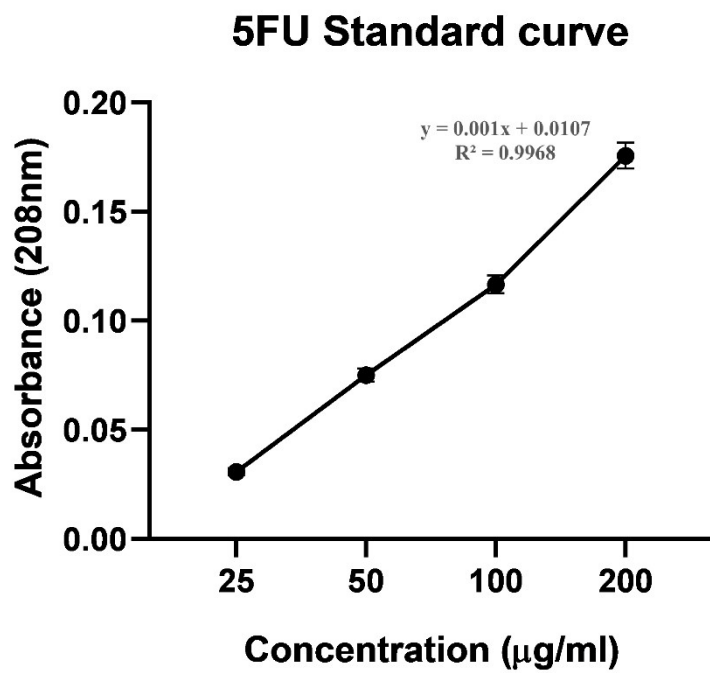

**Fig. S4** UV-vis spectra of different concentrations of 5FU taken to plot the standard curve for further experimentations.

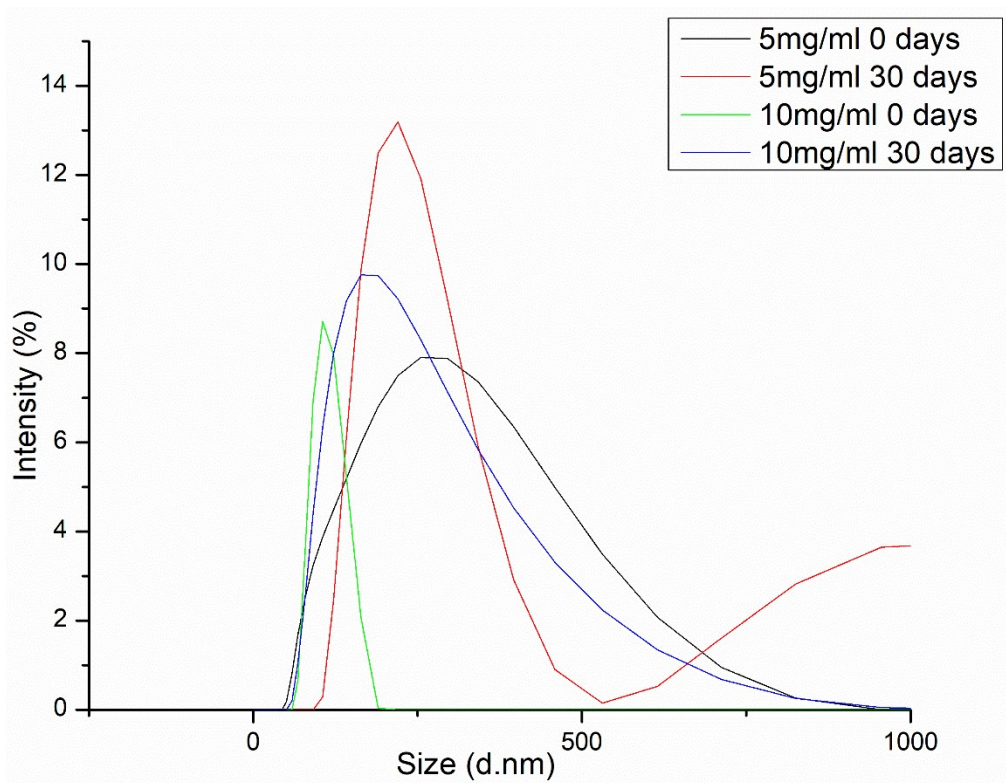

**Fig. S5** DLS analysis of different concentrations of nanoparticles made with PGS in solvent and their stability over 30 days period.
